# Supplementary material for: In situ construction of oxygen vacancy-rich and fluorine-doped carbon-coated Ca2Fe2O5 for improved lithium storage performance
Source: Royal Society of Chemistry journal article supplement (doi:10.1039/d3nj00242j), 2023-01-01
Supplement: d3nj00242j1.pdf [file d3nj00242j1.pdf]

# In situ construction oxygen vacancy-rich and fluorine doped carbon coated $\text{Ca}_2\text{Fe}_2\text{O}_5$ for improved lithium storage performance

Piao Zhu, <sup>[a]</sup> Gang Yang, <sup>[a]</sup> Xiujuan Sun, <sup>\*[a]</sup> Qiuhan Cao, <sup>[a]</sup> Yongjie Zhao, <sup>[a]</sup> Rui Ding, <sup>[a]</sup> Enhui Liu<sup>\*[a]</sup> and Ping Gao<sup>[a]</sup>

---

[a] P.Zhu, G.Yang, X.J.Sun, Q.H.Cao, Y.J.Zhao, R.Ding, E.H.Liu, P.Gao  
Key Laboratory of Environmentally Friendly Chemistry and Applications of Ministry of Education, College of Chemistry, Xiangtan University, Hunan 411105, P.R. China.  
E-mail: sunxj594@xtu.edu.cn; liuenhui@xtu.edu.cn

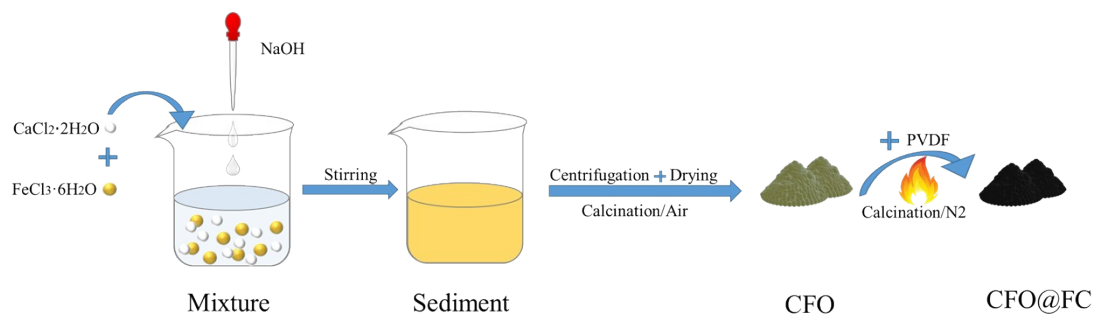

Figure S1. Preparation scheme for CFO@FC.

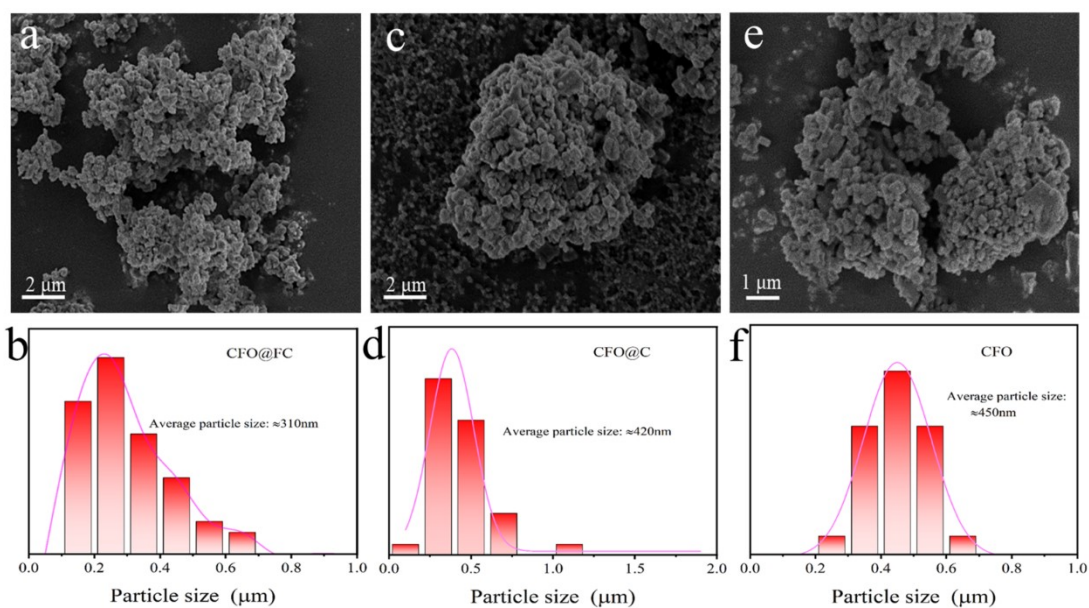

Figure S2. The statistical images of the CFO@FC, CFO@C and CFO samples (a), (c) (e) and their respective corresponding particle size distributions (b), (d) (f).

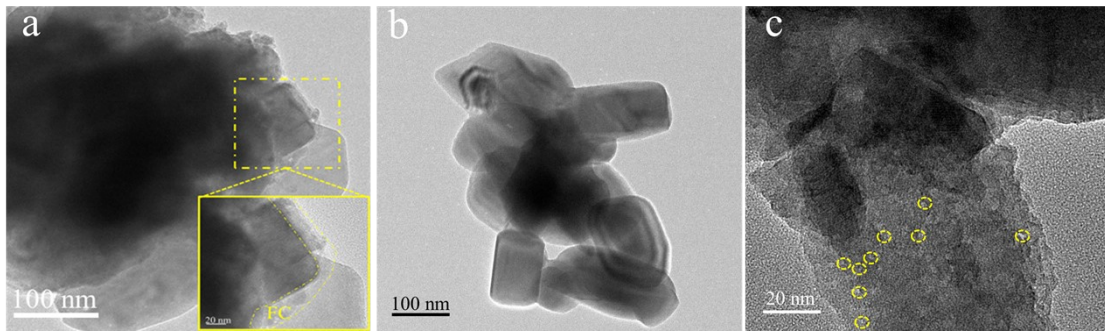

Figure S3. The TEM image of CFO@FC sample(a) (c) and CFO sample(b).

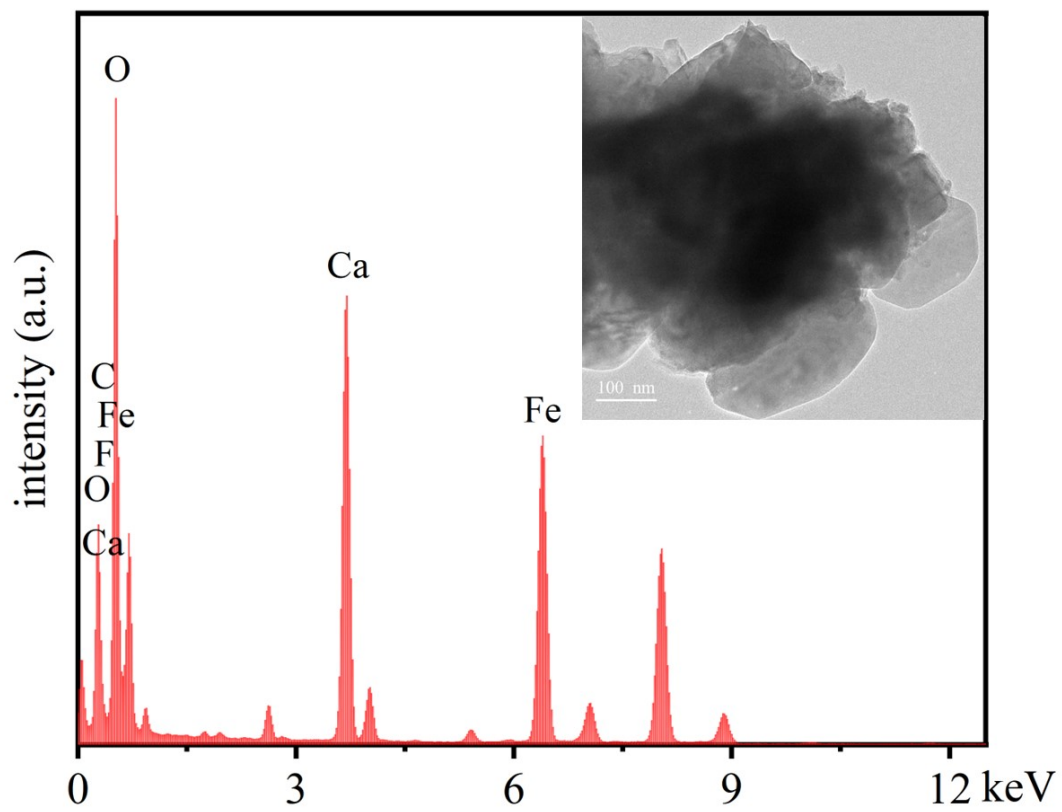

Figure S4. The EDS (inset is the TEM figure) image of the CFO@FC sample.

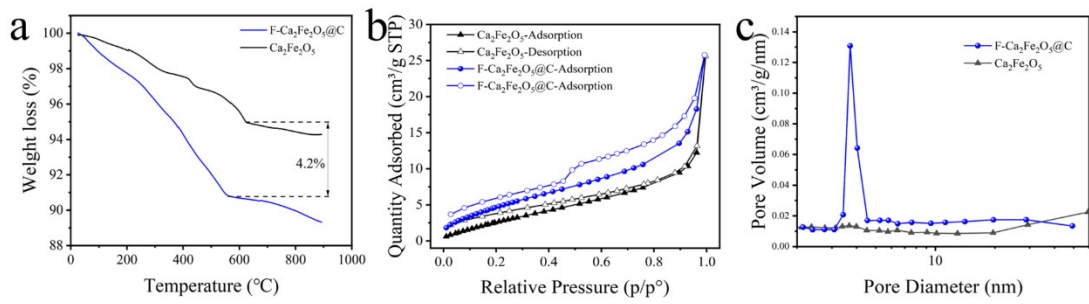

Figure S5. Thermogravimetric analysis of CFO@FC(a); nitrogen adsorption/desorption isotherms (b), pore volumes (c) of CFO@FC and CFO.

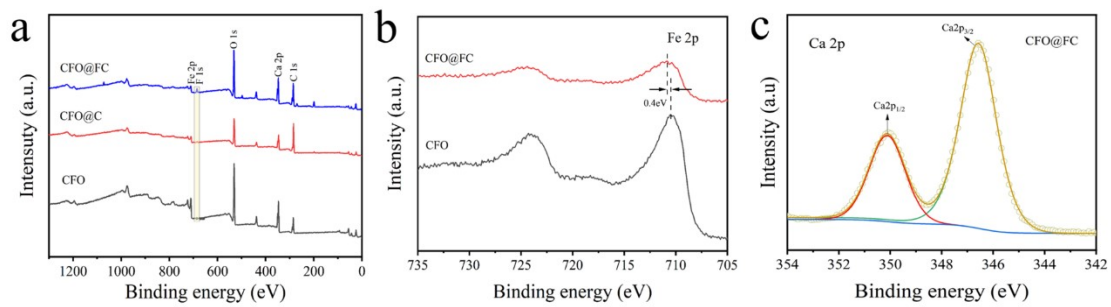

Figure S6. The XPS survey spectrum of CFO@FC, CFO@C, and CFO samples(a); the comparison of high-resolution XPS spectra of Fe 2p of CFO@FC and CFO (b); Ca 2p (c) of the CFO@FC samples.

Table. S1. The atomic percent of the samples derived from the quantitative analysis of the XPS spectra.

| Atomic (%) | Ca2p  | Fe2p  | O1s   | C1s   | F1s  | O(1s)/[Ca(2p) +Fe(2p)] |
|------------|-------|-------|-------|-------|------|------------------------|
| CFO@FC     | 10.71 | 9.44  | 28.1  | 48.77 | 2.98 | 1.39                   |
| CFO@C      | 11.67 | 10.71 | 35.51 | 42.11 | 0    | 1.59                   |
| CFO        | 12.35 | 11.54 | 49.63 | 26.48 | 0    | 2.08                   |



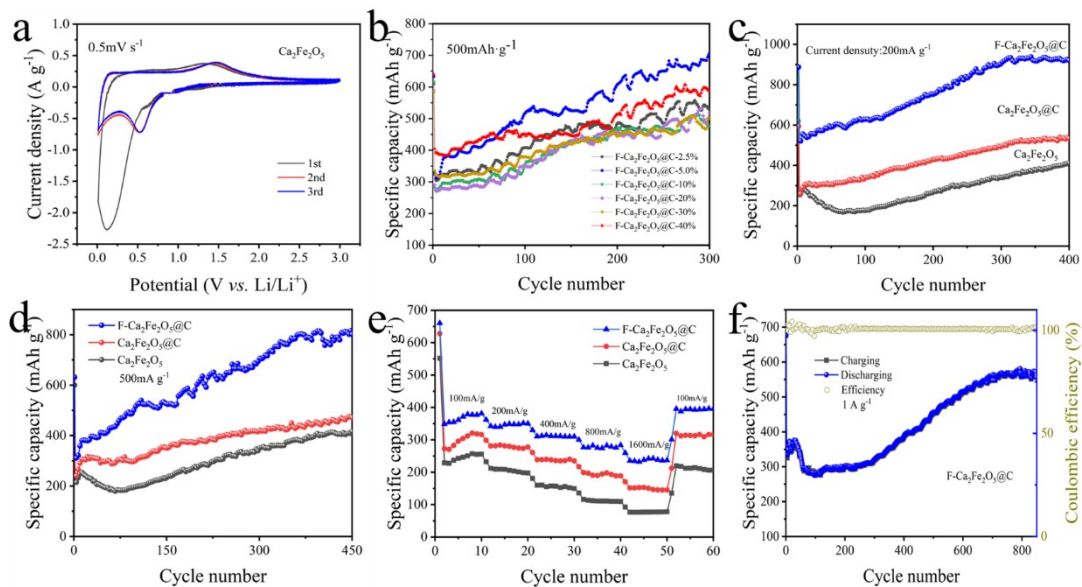

Figure S7. The cyclic voltammety of CFO at  $0.5 \text{ mV}\cdot\text{s}^{-1}$  (a), cycle performance of CFO@FC with different amounts of fluorine doping (b), cycle performance of CFO@FC, CFO@C and CFO electrodes at  $200 \text{ mA g}^{-1}$  (c), cycle performance of CFO@FC, CFO@C and CFO electrodes at  $500 \text{ mA g}^{-1}$  (d), rate performance from 100 to  $1600 \text{ mA g}^{-1}$  of CFO@FC, CFO@C and CFO electrodes (e), cycle performance of CFO@FC at  $1 \text{ A g}^{-1}$  (f).

Table S2. Comparison of CFO@FC nanoparticles (this work) with various Iron-based oxides as anodes for LIBs.

| material                                                                                  | synthetic method         | Li-storage performance (specific capacity (mAh g <sup>-1</sup> ) @current density (mA g <sup>-1</sup> ) @cycles | ref       |
|-------------------------------------------------------------------------------------------|--------------------------|-----------------------------------------------------------------------------------------------------------------|-----------|
| Ca <sub>2</sub> Fe <sub>2</sub> O <sub>5</sub>                                            | solid-state reaction     | 183@60@50                                                                                                       | 1         |
| Ca <sub>2</sub> Co <sub>2</sub> O <sub>5</sub>                                            | solid-state reaction     | 380@60@50                                                                                                       | 1         |
| Ca <sub>2</sub> Fe <sub>2</sub> O <sub>5</sub>                                            | electrospinning          | 530@50@100                                                                                                      | 2         |
| Ca <sub>2</sub> Fe <sub>2</sub> O <sub>5</sub> nanoparticles                              | combustion method        | 240@75@50                                                                                                       | 3         |
| Ca <sub>2</sub> Fe <sub>2</sub> O <sub>5</sub> nanofibers                                 | electrospinning          | 622@50@75; 485 @200@250                                                                                         | 3         |
| Sr <sub>2</sub> Fe <sub>2</sub> O <sub>6-δ</sub>                                          | solid-state synthesis    | 393@25@50                                                                                                       | 4         |
| Fe <sub>2</sub> O <sub>3</sub> powder orthorhombic                                        | heat treatment           | 500@50@50                                                                                                       | 5         |
| CaFe <sub>2</sub> O <sub>4</sub> microrod                                                 | co-precipitation         | 400@500@100                                                                                                     | 6         |
| porous CaFe <sub>2</sub> O <sub>4</sub> Nanorod-shaped                                    | combustion method        | 551@200@150                                                                                                     | 7         |
| NaFeSnO <sub>4</sub>                                                                      | solid-state reaction     | 179@10@200                                                                                                      | 8         |
| CaFe <sub>2</sub> O <sub>4</sub>                                                          | solid-state reaction     | 200@60@50                                                                                                       | 9         |
| Li <sub>0.5</sub> Ca <sub>0.5</sub> (Fe <sub>1.5</sub> Sn <sub>0.5</sub> ) O <sub>4</sub> | solid-state reaction     | 405@60@50                                                                                                       | 9         |
| MgFe <sub>2</sub> O <sub>4</sub> nanoparticles                                            | Sol-gel method           | 293@90@50                                                                                                       | 10        |
| Fe <sub>2</sub> O <sub>3</sub>                                                            | template-assisted method | 190@100@150                                                                                                     | 11        |
| CFO@FC nanoparticles                                                                      | heat treatment           | 927@200@400; 815@500@450; 572@1000@820;                                                                         | This work |

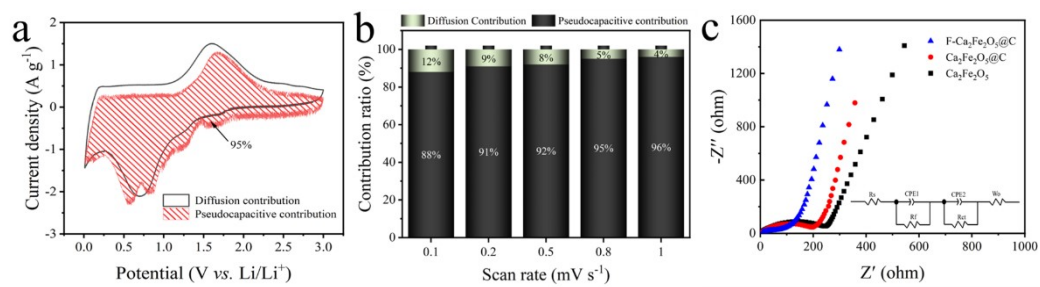

Figure S8. The capacitive and diffusion contribution at a scan rate of  $5 \text{ mV}\cdot\text{s}^{-1}$ (a), the normalized ratio values of pseudocapacitive and diffusion contribution at  $0.1\text{--}1.0 \text{ mV s}^{-1}$  of CFO@FC (b), the Nyquist plots in the frequency range of  $100 \text{ kHz}$  to  $0.01 \text{ Hz}$ , the corresponding equivalent circuits (the insert image) of CFO@FC, CFO@C and CFO electrode(c).

Table S3. Various parameters were obtained from the Nyquist plot fitting of the CFO@FC, CFO@C and CFO electrodes.

| Electrode | $R_s(\Omega)$ | $R_f(\Omega)$ | $R_{ct}(\Omega)$ |
|-----------|---------------|---------------|------------------|
| CFO@FC    | 6.00          | 7.53          | 26.18            |
| CFO@C     | 3.12          | 12.31         | 141.50           |
| CFO       | 2.66          | 28.16         | 216.70           |

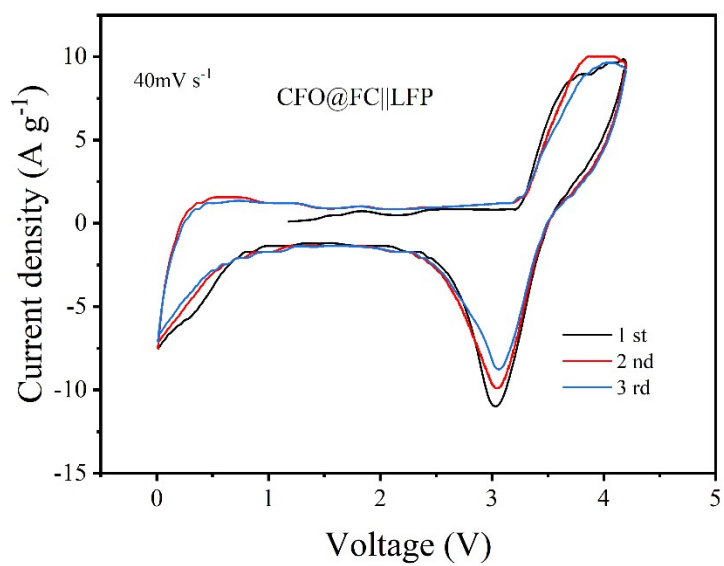

Figure S9. CV curve of CFO@FC at 40 mV s<sup>-1</sup>.

## References

1. N. Sharma, K. M. Shaju, G. V. Subba Rao and B. V. R. Chowdari, *Electrochim Acta*, 2004, **49**, 1035-1043.
2. S. K. Sundriyal and Y. Sharma, *Appl Surf Sci*, 2021, **560**.
3. S. K. Sundriyal and Y. Sharma, *Acs Appl Energ Mater*, 2020, **3**, 6360-6373.
4. R. K. Hona, A. K. Thapa and F. Ramezanipour, *Chemistryselect*, 2020, **5**, 5706-5711.
5. J. E. Hong, R. G. Oh and K. S. Ryu, *Environ Sci Pollut R*, 2016, **23**, 14656-14662.
6. K. Zhang, W. Hong, P. Gao, R. Ding and E. Liu, *Int J Hydrogen Energ*, 2020, **45**, 22160-22165.
7. N. Shaji, P. Santhoshkumar, M. Nanthagopal, C. Senthil and C. W. Lee, *Appl Surf Sci*, 2019, **491**, 757-764.
8. D. S. Bhange, D. A. Anang, G. Ali, J.-H. Park, J.-Y. Kim, J.-H. Bae, W. Y. Yoon, K. Y. Chung and K.-W. Nam, *Electrochem Commun*, 2020, **121**.
9. N. Sharma, K. M. Shaju, G. V. Subba Rao and B. V. R. Chowdari, *J Power Sources*, 2003, **124**, 204-212.
10. Y. Pan, Y. Zhang, X. Wei, C. Yuan, J. Yin, D. Cao and G. Wang, *Electrochim Acta*, 2013, **109**, 89-94.
11. S. Li, Y. Zhang and J. Huang, *J Alloy Compd*, 2019, **783**, 793-800.
